# Supplementary material for: Amplified electrochemical microRNA biosensor using a hemin-G-quadruplex complex as the sensing element
Source: Royal Society of Chemistry journal article supplement (doi:10.1039/c2ra20487h), 2012-01-01
Supplement: c2ra20487h.pdf [file c2ra20487h.pdf]

## Supplementary Information

### **Amplified electrochemical microRNA biosensor using hemin-G-quadruplex complex as the sensing element**

Yunlei Zhou <sup>b†</sup>, Mo Wang <sup>a</sup>, Xiaomeng Meng <sup>a</sup>, Huanshun Yin <sup>a,\*</sup>, Shiyun Ai <sup>a,\*</sup>

<sup>a</sup> *College of Chemistry and Material Science, Shandong Agricultural University,  
Taian, 271018, Shandong, China*

<sup>b</sup> *College of Life Science, Beijing Normal University, 100875, Beijing, China*

\* Corresponding author.

† These authors contributed equally to this work.

Tel: +86 538 8247660

Fax: +86 538 8242251

*E-mail address:* ashy@sdau.edu.cn (S.Y. Ai)

Table S1. Comparison of RSD for microRNA detection between this work and previous reports  
based on electrochemical techniques.

|   | Detection methods                      | RSD (%) | References |
|---|----------------------------------------|---------|------------|
| 1 | Electrochemical impedance spectroscopy | <12%    | [1]        |
| 2 | Amperometry                            | 16-22%  | [2]        |
| 3 | Electrochemical impedance spectroscopy | <15%    | [3]        |
| 4 | Amperometry                            | <15%    | [4]        |
| 5 | Square wave voltammetry                | <15%    | [5]        |
| 6 | Conductance                            | <15%    | [6]        |
| 7 | Amperometry                            | <15%    | [7]        |
| 8 | Amperometry                            | 12.62%  | This work  |

References:

- [1] Y. Peng, Z. Gao, Amplified detection of microRNA based on ruthenium oxide nanoparticle-Initiated deposition of an insulating film, *Anal. Chem.* 82 (2011) 820-827.
- [2] Z. Gao, Y. H. Yu, Direct labeling microRNA with an electrocatalytic moiety and its application in ultrasensitive microRNA assays, *Biosens. Bioelectron.* 22 (2007) 933-940.
- [3] G.-J. Zhang, J. H. Chua, R.-E. Chee, A. Agarwal, S. M. Wong, Label-free direct detection of MiRNAs with silicon nanowire biosensors, *Biosens. Bioelectron.* 24 (2009) 2504-2508.
- [4] Z. Gao, Y. Peng, A highly sensitive and specific biosensor for ligation-and PCR-free detection of MicroRNAs, *Biosens. Bioelectron.* 26 (2011) 3768–3773.
- [5] Y. Peng, G. Yi, Z. Gao, A highly sensitive microRNA biosensor based on ruthenium oxide nanoparticle-initiated polymerization of aniline, *Chem. Commun.* 46 (2010) 9131-9133.
- [6] Y. Fan, X. Chen, A. D. Trigg, C. Tung, J. Kong, Z. Gao, Detection of microRNAs using target-guided formation of conducting polymer nanowires in nanogaps, *J. Am. Chem. Soc.* 129 (2007) 5437-5443.
- [7] Z. Gao, Y. H. Yu, A microRNA biosensor based on direct chemical ligation and electrochemically amplified detection, *Sens. Actuators, B* 121 (2007) 552-559.
